# Supplementary material for: Optimized Process for Melt Pyrolysis of Methane to Produce Hydrogen and Carbon Black over Ni Foam/NaCl-KCl Catalyst
Source: MDPI journal article supplement (doi:10.3390/pr11020360), 2023-01-23
Supplement: s1 [file s1]

Article

# Optimized Process for Melt Pyrolysis of Methane to Produce Hydrogen and Carbon Black over Ni Foam/NaCl-KCl Catalyst

Mengying Liu <sup>1</sup>, Zeai Huang <sup>1,2,\*</sup>, Yunxiao Zhou <sup>1</sup>, Junjie Zhan <sup>1</sup>, Kuikui Zhang <sup>1</sup>, Mingkai Yang <sup>1</sup>, Ying Zhou <sup>1,2,3,\*</sup>

<sup>1</sup> School of New Energy and Materials, Southwest Petroleum University, Chengdu 610500, China

<sup>2</sup> State Key Laboratory of Oil and Gas Reservoir Geology and Exploitation, Southwest Petroleum University, Chengdu 610500, China

<sup>3</sup> Tianfu Yongxing Laboratory, Chengdu 610217, China

\* Correspondence: zeai.huang@swpu.edu.cn (Z.H.); yzhou@swpu.edu.cn (Y.Z.)

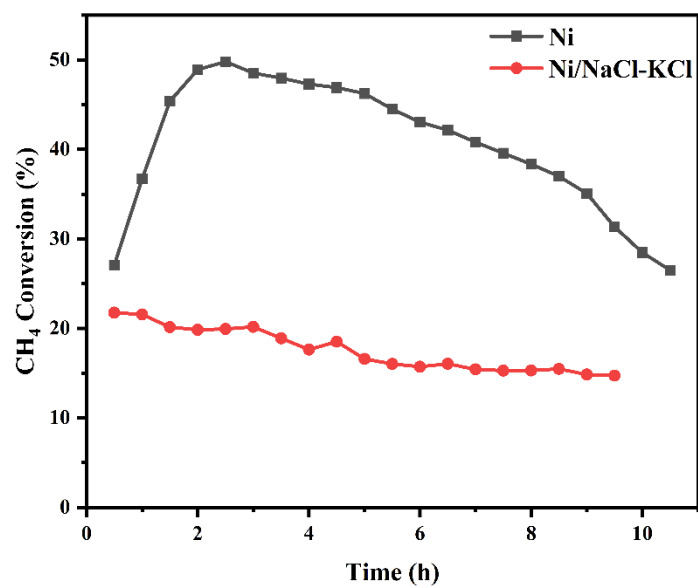

**Figure S1.** Comparison of catalyst stability (Conditions: 99% 100 sccm CH<sub>4</sub>; 900°C; 20 ppi Ni Foam; 150 g NaCl-KCl).

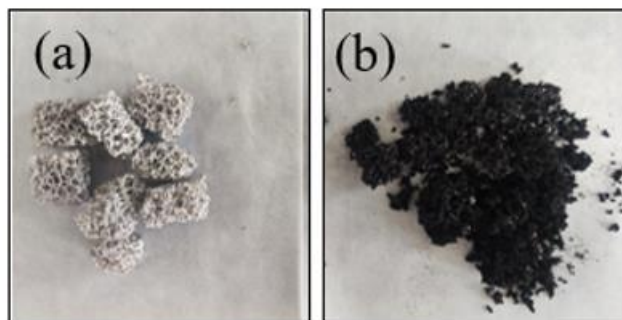

**Figure S2.** Comparison of Ni-Foam before and after: (a) Before reaction, (b) After reaction.
